# Supplementary material
Source: ML conference proceedings conference paper supplement (https://openaccess.thecvf.com/content/CVPR_2020/html/Mi_Hierarchical_Graph_Attention_CVPR_2020_paper.html)
Supplement: Supplementary file 1 [file Mi_Hierarchical_Graph_Attention_CVPR_2020_supplemental.pdf]

# Supplementary Material for “Hierarchical Graph Attention Network for Visual Relationship Detection”

Li Mi, Zhenzhong Chen\*

School of Remote Sensing and Information Engineering, Wuhan University, China

{milirs, zzchen}@whu.edu.cn

## 1. Dataset

The examples of VRD and VG dataset are presented in Figure 1.

### 1.1. Visual Relationship Detection (VRD)

There are 70 predicate categories in VRD dataset.

*Verb:* attach to, carry, contain, cover, drive, drive on, eat, face, feed, fly, follow, hit, hold, kick, lean on, look, lying on, park behind, park next, park on, play with, pull, rest on, ride, sit behind, sit next to, sit on, sit under, skate on, sleep next to, sleep on, stand behind, stand next to, stand on, stand under, talk, touch, use, walk, walk beside, walk next to, walk past, walk to, watch, wear.

*Spatial:* above, adjacent to, behind, below, beneath, beside, in, in the front of, inside, near, next to, on, on the left of, on the right of, on the top of, outside of, over, under.

*Preposition:* across, against, at, by, has, with.

*Comparative:* taller than.

### 1.2. Visual Genome (VG)

There are 100 predicate categories in VG dataset.

*Verb:* adorn, attach to, belong to, build into, carry, cast, catch, connect to, contain, cover, cover in, cover with, cross, cut, drive on, eat, face, fill with, fly, fly in, grow in, grow on, hang in, hang on, hit, hold, hold by, lay in, lay on, lean on, look at, mount on, paint on, park, play, print on, pull, read, reflect in, rest on, ride, say, show, sit at, sit in, sit on, stand behind, stand on, standing by, standing in, standing next to, support, surround, swing, throw, touch, use, walk, walk in, walk on, watch, wear, wear by, write on.

*Spatial:* above, behind, below, beneath, between, in, in front of, in middle of, inside, near, next to, on, on back of, on bottom of, on side of, on top of, outside, over, under, underneath.

*Preposition:* across, against, along, around, at, beside, by, for, from, have, of, part of, to, with.

*Comparative:* small than, tall than.

VRD

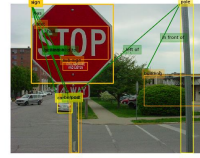

sign above post  
sign in front of car  
sign has text  
sign has sub-sign  
sign attached to pole  
post below sign  
post left of post  
pole in front of building  
car behind sign  
car behind post  
car right of van  
van left of car  
text on sign  
text in front of car  
sign under sign  
sign has text  
building below sky  
bush in front of tree  
sky above road

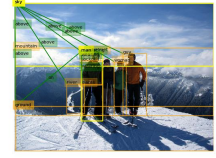

sky above mountain  
sky above river  
sky above guy  
sky above man  
sky above woman  
sky above ground  
man on ground  
man wearing helmet  
man wearing jacket  
man wearing pants  
man wearing goggles  
man wearing ski boots  
man on skis  
man holding poles  
mountain has river  
mountain behind guy  
river behind guy  
river behind coat  
river behind ground  
river behind man  
river behind woman

VG

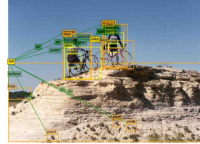

bike in front of person  
person on hill  
plant on hill  
man wearing shirt  
tree behind hill  
man behind bike  
man wearing short  
bag on bike  
man holding bike  
hill under bike  
man with bike  
man behind bike  
bike near bike

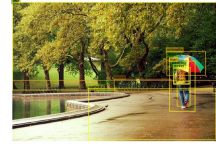

man holding umbrella  
man wears shirt  
leaf on tree  
bench along sidewalk  
man in jacket  
man in jean  
man wearing jacket  
umbrella on man

Figure 1. Visualization of relationship annotation in VRD and VG dataset. For each triplet, the orange bounding box denotes the region of subject, while the yellow bounding box denotes the region of object. The predicate is represented as a green line, which connects the subject and the object.

## 2. Graph Attention Visualization

The visualization of graph attention is shown in Figure 2 and Figure 3 for object-level graph attention and triplet-level graph attention, respectively.

\*Corresponding author: Zhenzhong Chen.

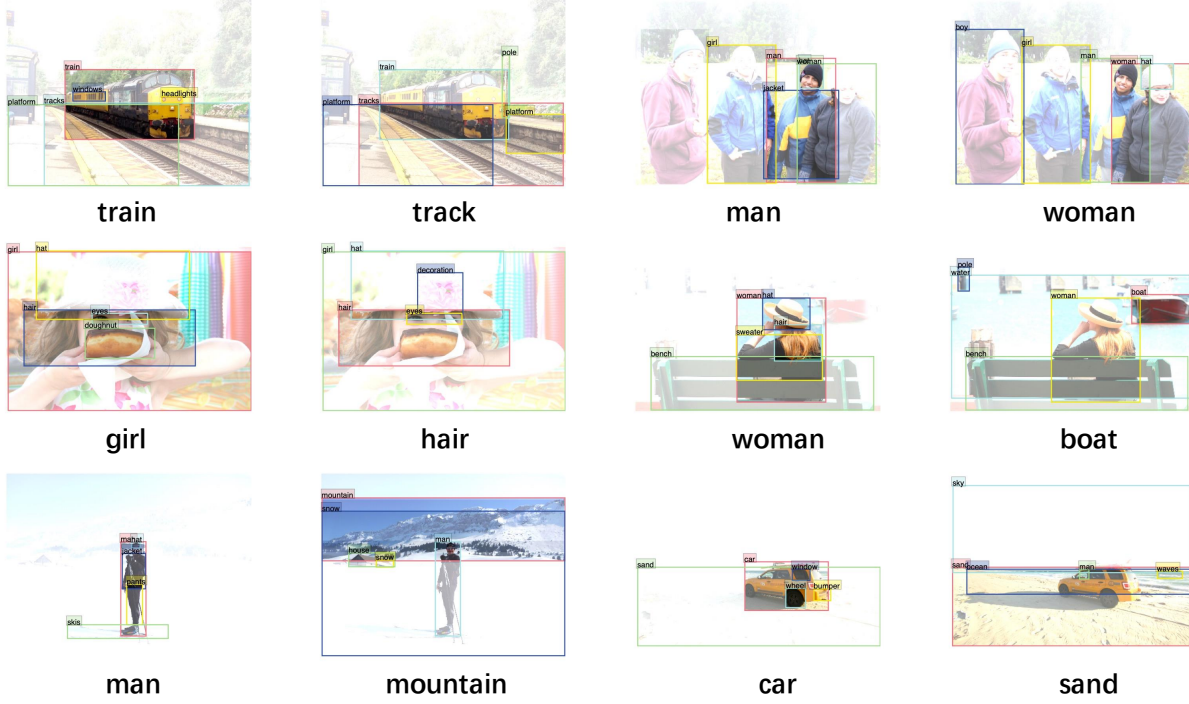

Figure 2. Visualization of object-level graph attention maps. The red bounding box is the reference region and the other four bounding boxes shown in each image are the top-4 attended regions.

### 2.1. Object-level Graph Attention

Figure 2 demonstrates the effectiveness of object-level graph attention. As is shown in Figure 2, object attention weight varies with different reference object. For example, comparing the first and second image of the last row, the object “man” is more close to the object “jacket” and “pants”, while the object “mountain” is more likely to interact with the object “snow” and “house”.

### 2.2. Triplet-level Graph Attention

From Figure 3 we can see, interactions among triplets are significant context information for VRD. For example, the attention maps of “dog-frisbee” and “water-bank” are different, which indicates the other triplets in the image will have different effects on these two triplets.

### 3. More Examples

More results of HGAT are shown in Figure 4. Green, yellow and red color denotes the correct triples, correct but unannotated triples and failed triples, respectively. In some examples, there are redundant edges and missing edges in the initial graph. The qualitative results demonstrate that prior knowledge and attention mechanism alleviate the detrimental effects of inaccurate graph.

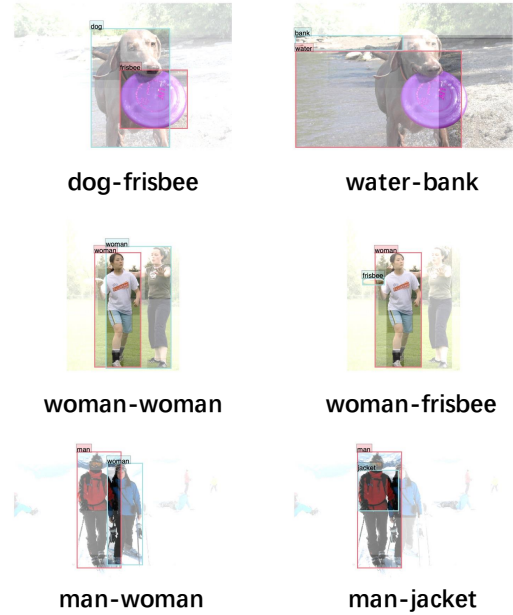

Figure 3. Visualization of triplet-level graph attention maps. The red bounding box and the blue bounding box represents the subject region and object region, respectively.

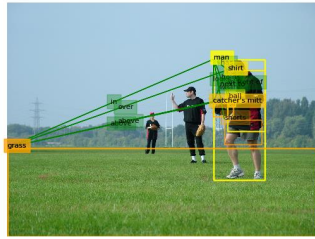

man has shirt  
man wears shorts  
man in grass  
dog has nose  
shirt near grass

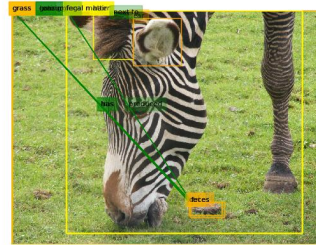

grass around zebra  
zebra eating grass  
zebra has mouse  
zebra has leg  
zebra has ear

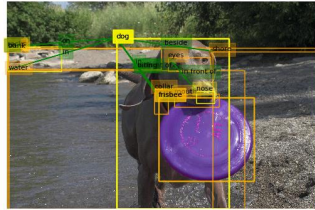

frisbee in front of dog  
dog on sand  
dog near water  
dog has nose  
dog near rocks

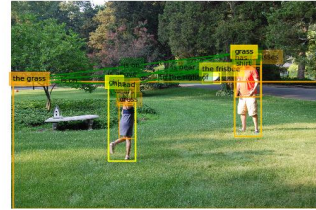

man on grass  
man has shirt  
frisbee next to man  
girl wears dress  
girl has frisbee

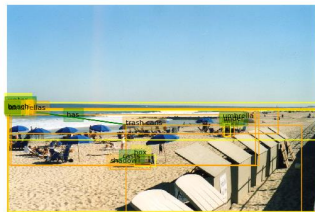

beach has sand  
sand on beach  
waves next to beach  
water near beach  
dog has nose  
man near water

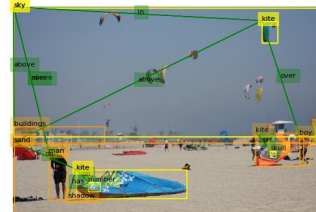

kite in sky  
frisbee next to man  
kite over man  
buildings near sand  
man has shirt

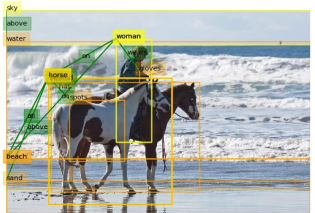

sky above water  
woman on horse  
woman on beach  
horse near horse  
horse in water

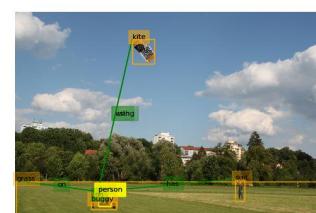

person with kite  
person on grass  
tree next to tree  
man in grass  
trees near grass

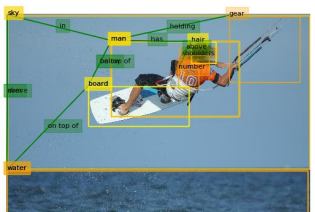

sky above water  
board below man  
man on top of board  
number on shirt  
horse in water

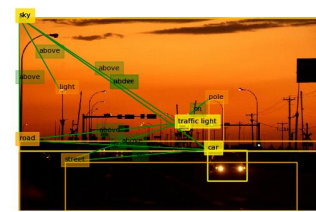

car on road  
sky above road  
car on street  
light on road  
car has lamp

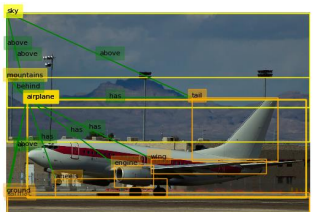

airplane has tail  
airplane has engine  
airplane has wing  
airplane on ground  
airplane near mountain

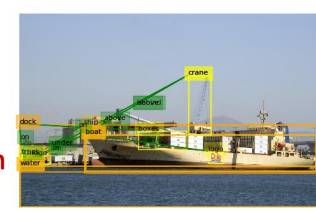

boat on water  
sky above water  
water under boat  
boxes on boat  
boat near boat

Figure 4. More predicate prediction results of HGAT. Green, yellow and red color denotes the correct triples, correct but unannotated triples and failed triples, respectively.
